# Supplementary material for: Multi-omics data integration reveals metabolome as the top predictor of the cervicovaginal microenvironment
Source: PubMed Central journal article supplement (PMC8901057; doi:10.1371/journal.pcbi.1009876), 2022-02-23

2-keto-3-deoxy-gluconate

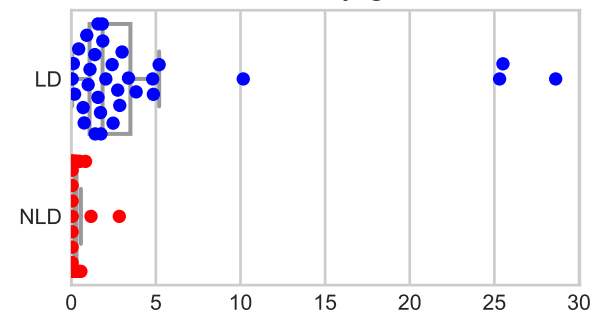

glycerophosphoglycerol

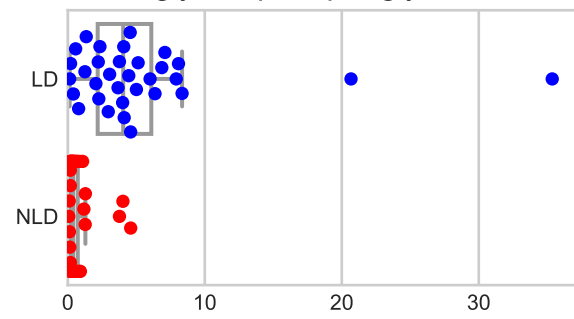

alpha-hydroxyisovalerate

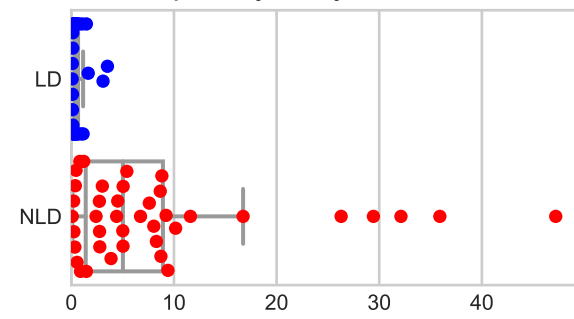

sedoheptulose

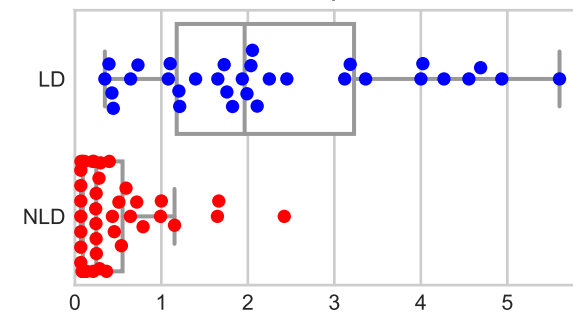

5,6-dihydrouridine

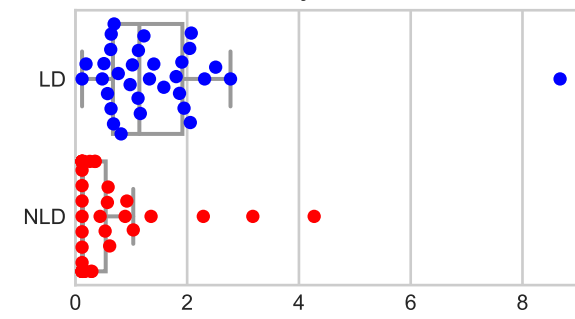

tyrosylglycine

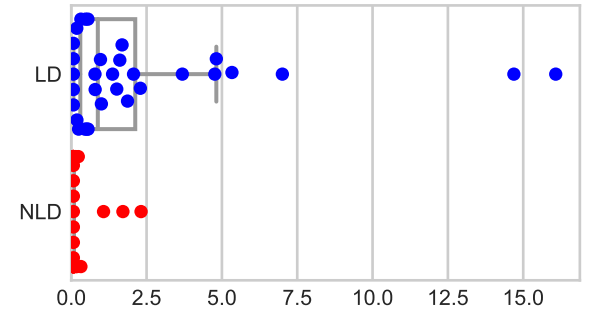

threonylphenylalanine

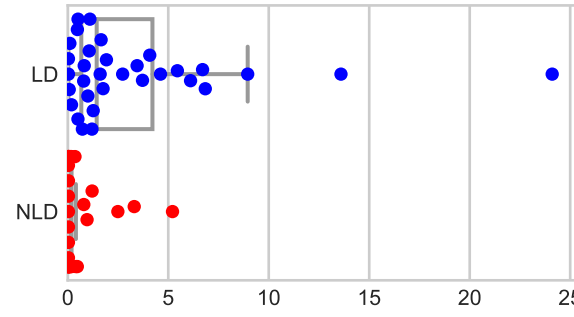

mevalonate

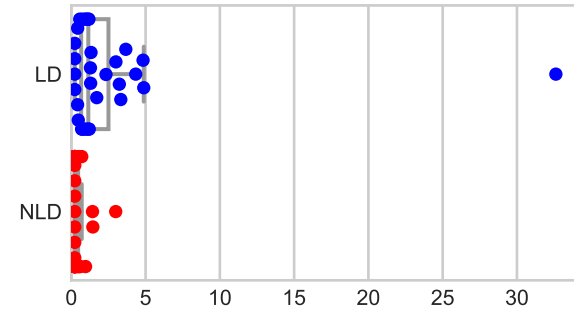

glycerophosphoethanolamine

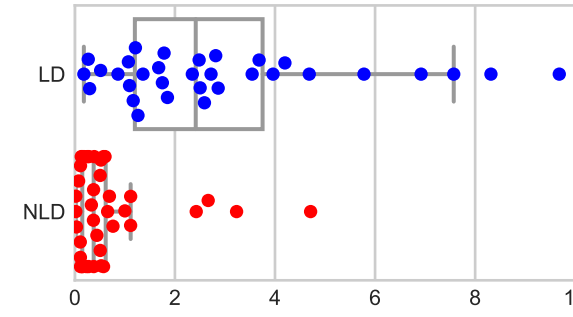

gluconate

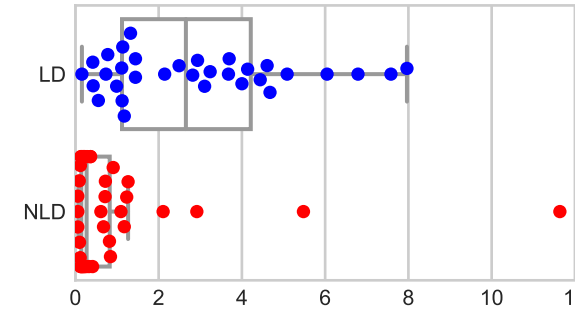

tyrosine

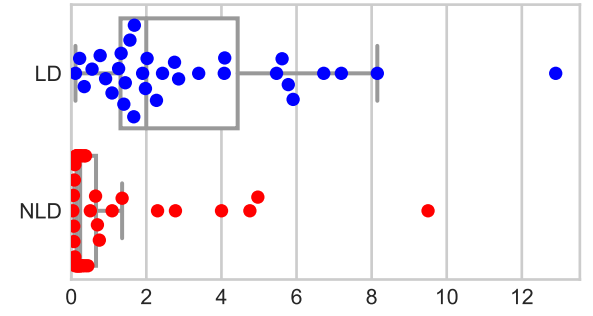

valylglutamine

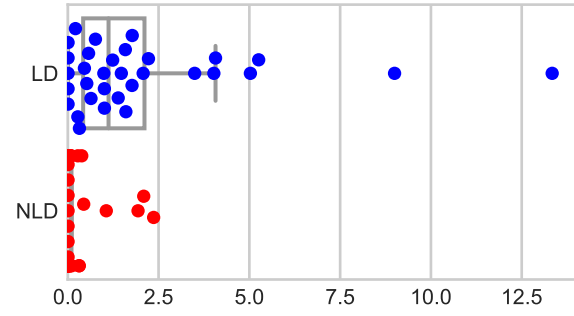

phenylalanylglycine

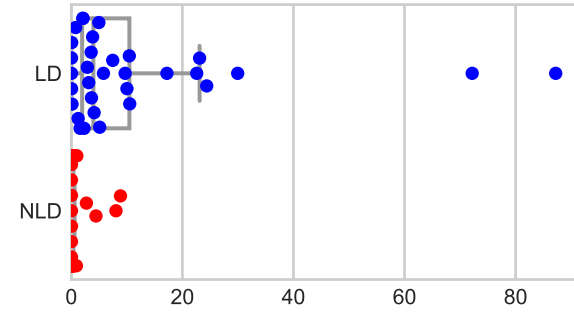

alanylleucine

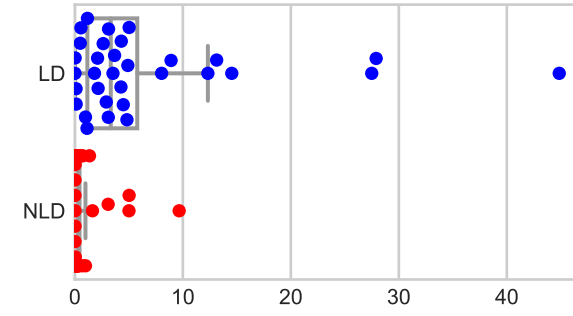

isoleucylglycine

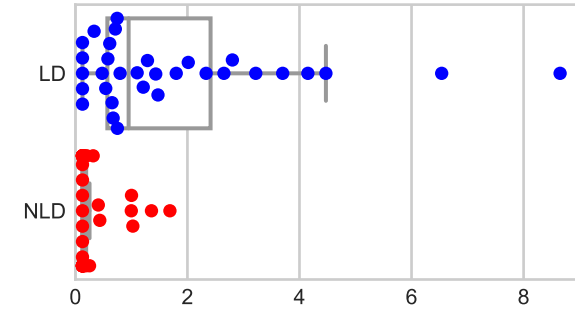

MIF

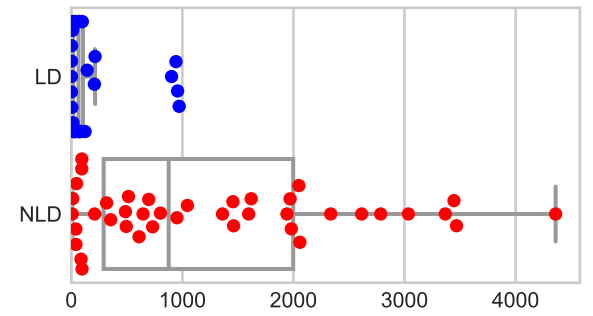

valylleucine

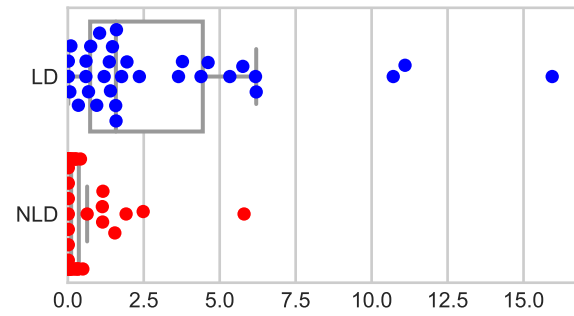

pipercolate

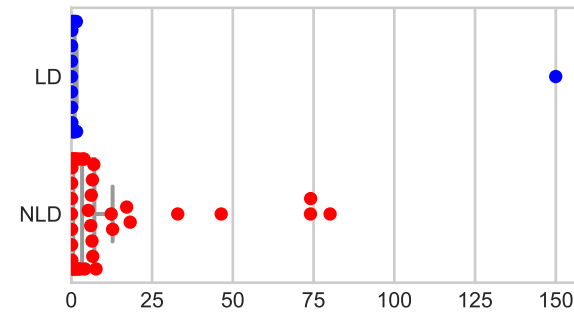

leucylglycine

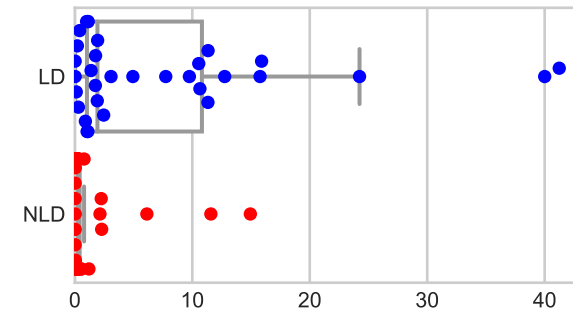

2-hydroxy-3-methylvalerate

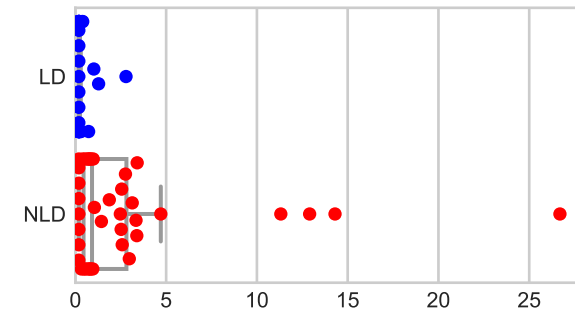

glycerophosphoserine

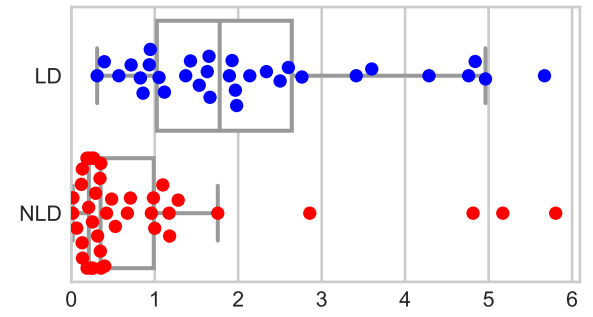

2-hydroxybutyrate/2-hydroxyisobutyrate

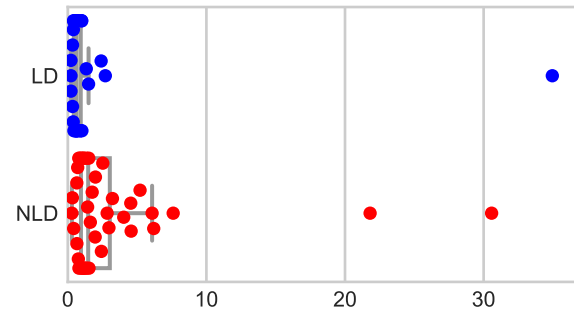

deoxycarnitine

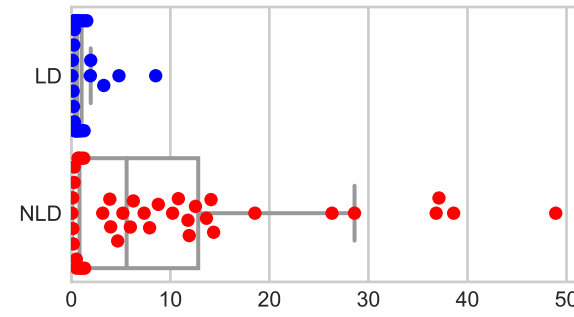

mevalonolactone

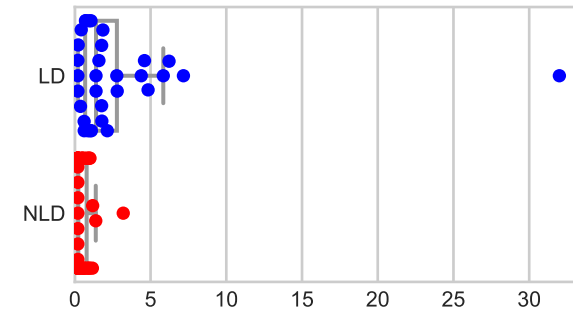

glutaminylleucine

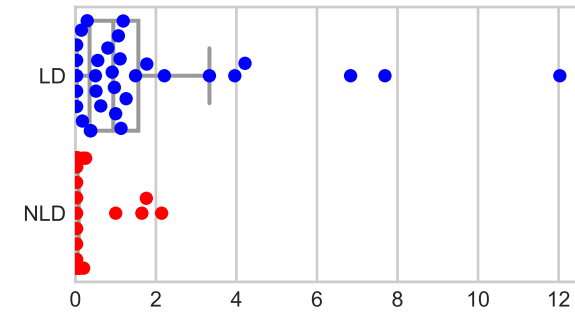

Supplement: pcbi.1009876.s011.pdf [file pcbi.1009876.s011.pdf]
