# Supplementary material for: Multi-omics data integration reveals metabolome as the top predictor of the cervicovaginal microenvironment
Source: PubMed Central journal article supplement (PMC8901057; doi:10.1371/journal.pcbi.1009876), 2022-02-23
Supplement: pcbi.1009876.s010.pdf [file pcbi.1009876.s010.pdf]

Raes

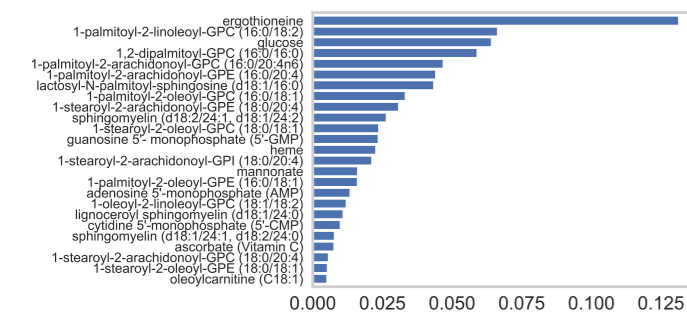

Sfas

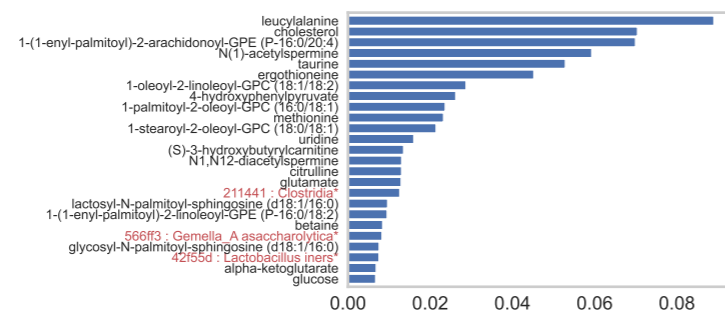

Hgf

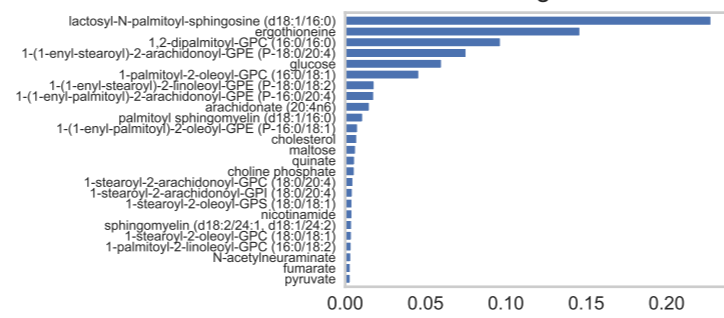

Il-10

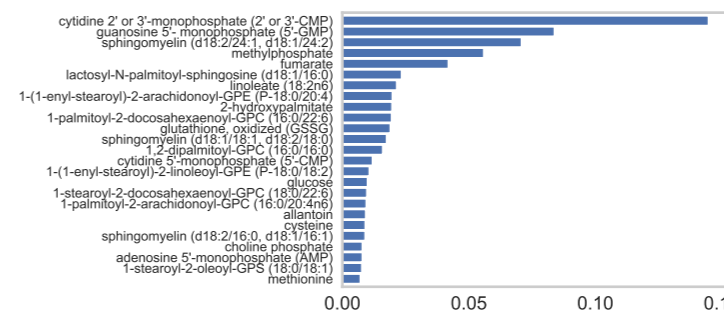

Il-1beta

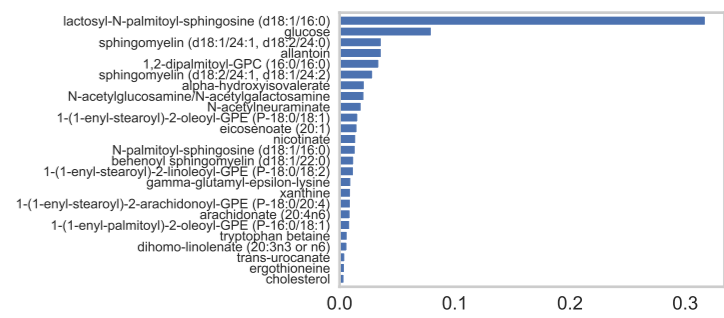

Tnfalpha

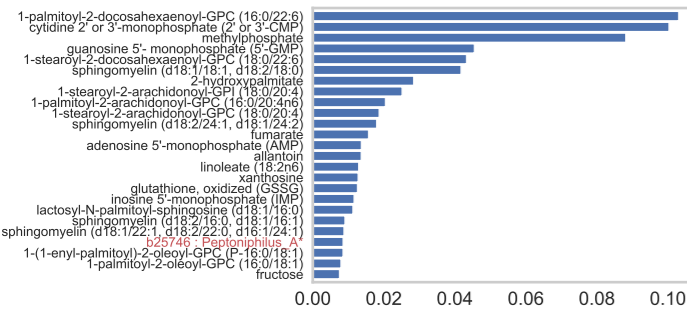

Cyfra 21-1

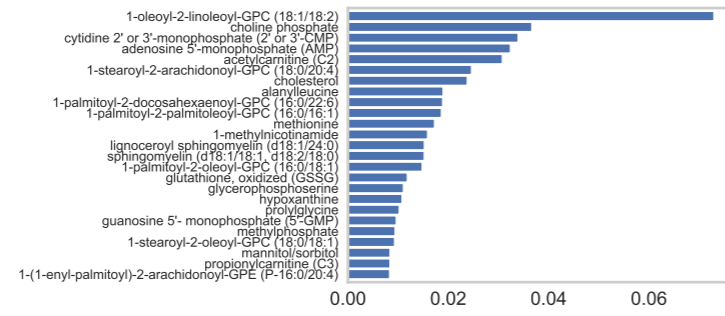

Vegf

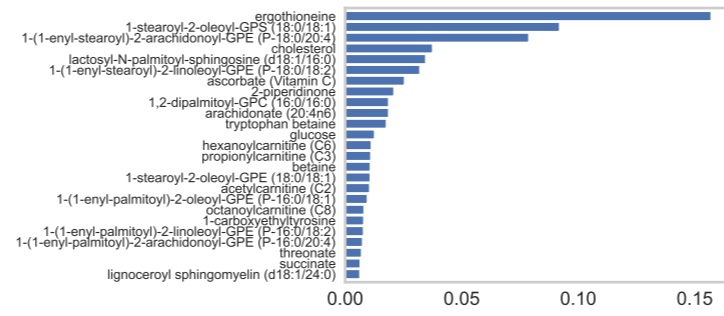

Il-8

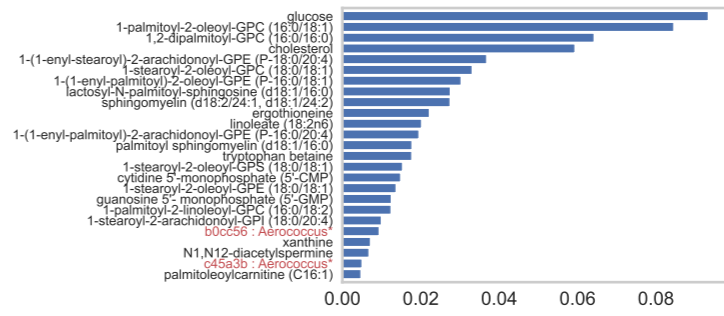

Cea

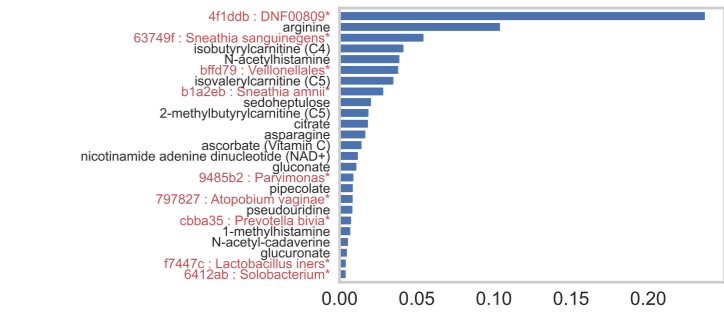

Fgf2

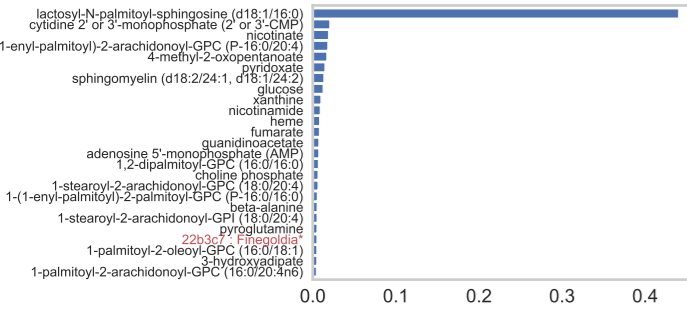

Mip-1alpha

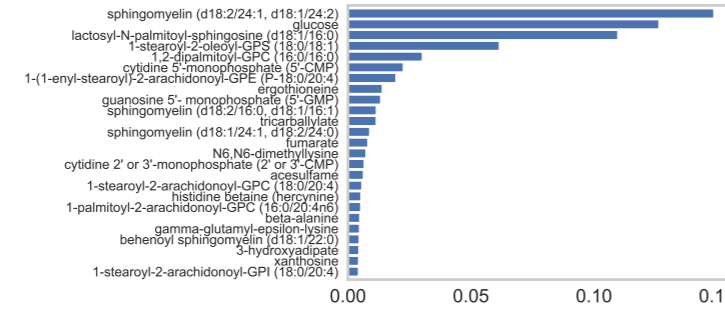

Scf

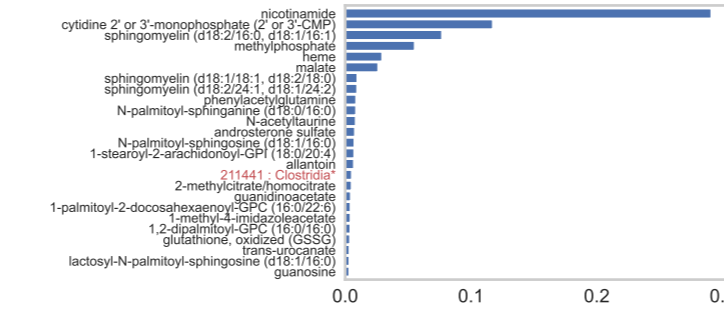

Fit-3l

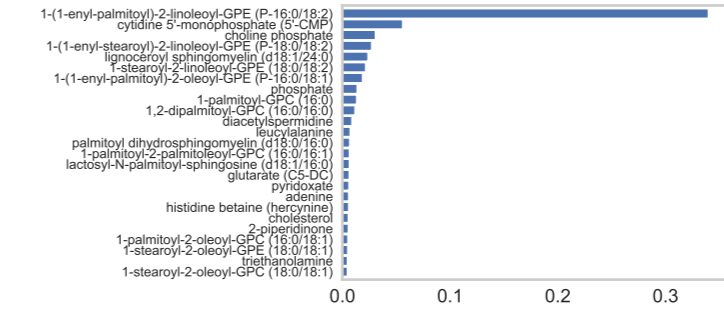

Mif

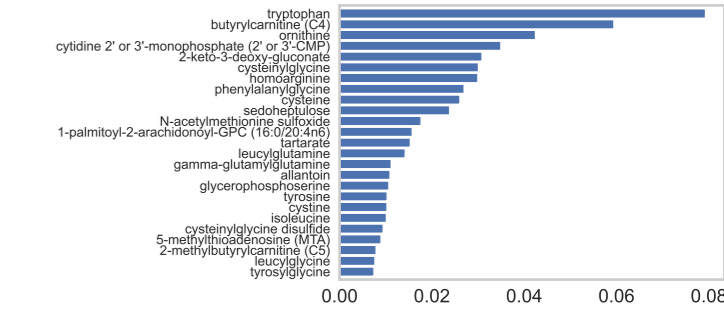

Scd40l

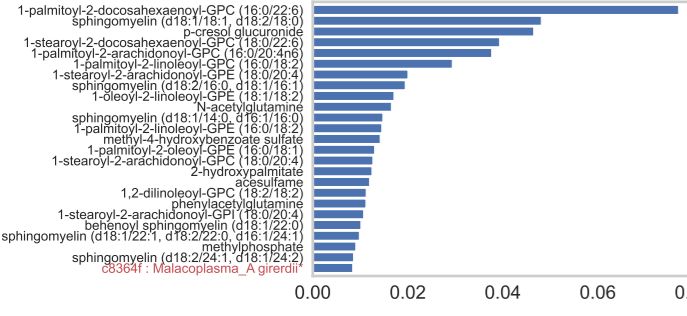

Beta hcg

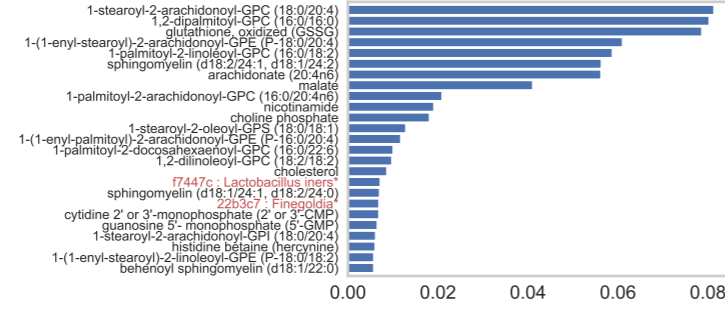

Ip-10

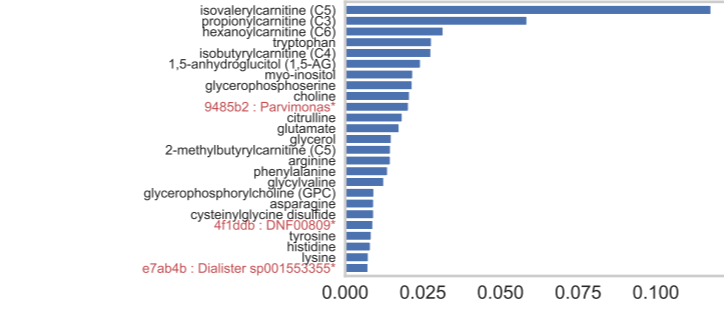

Il-12p70

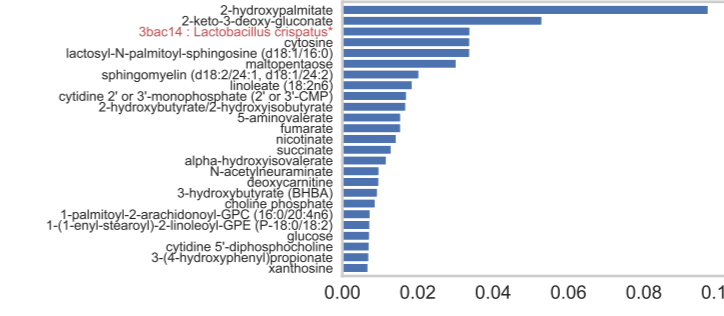

Tgf alpha

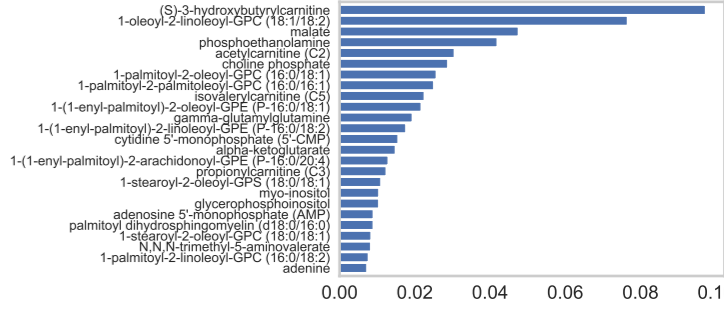

Leptin

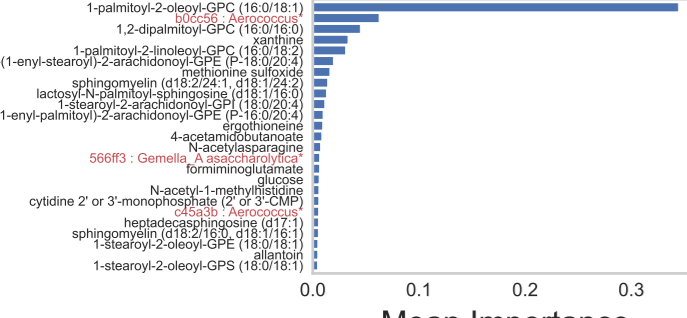

Trail

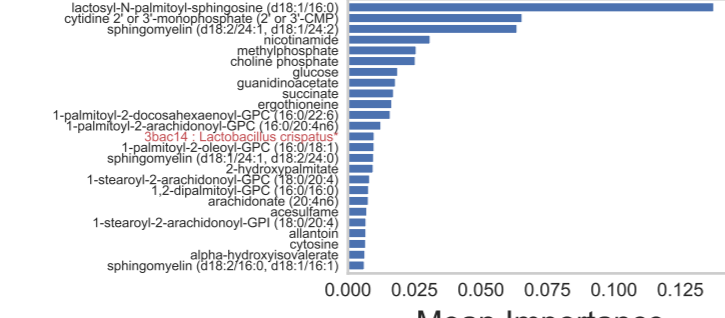

Mip-1beta

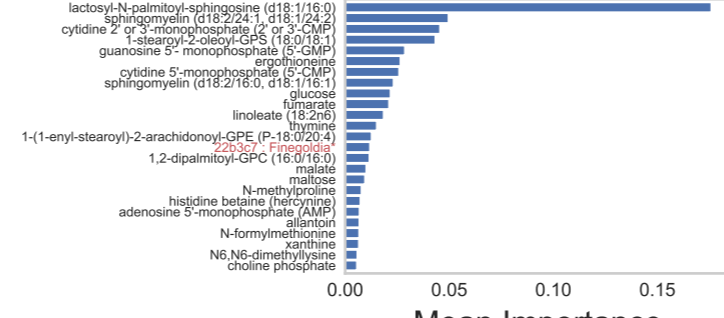

Il-17a

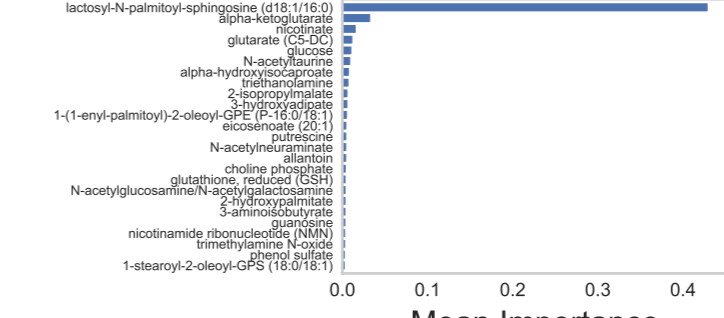

Prolactin

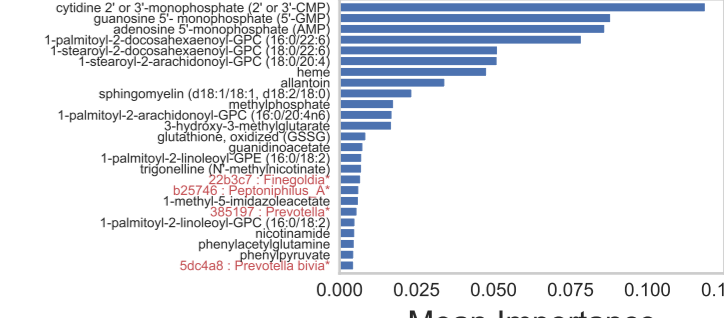

Mean Importance

Mean Importance

Mean Importance

Mean Importance

Mean Importance
