# Supplementary material for: Multi-omics data integration reveals metabolome as the top predictor of the cervicovaginal microenvironment
Source: PubMed Central journal article supplement (PMC8901057; doi:10.1371/journal.pcbi.1009876), 2022-02-23

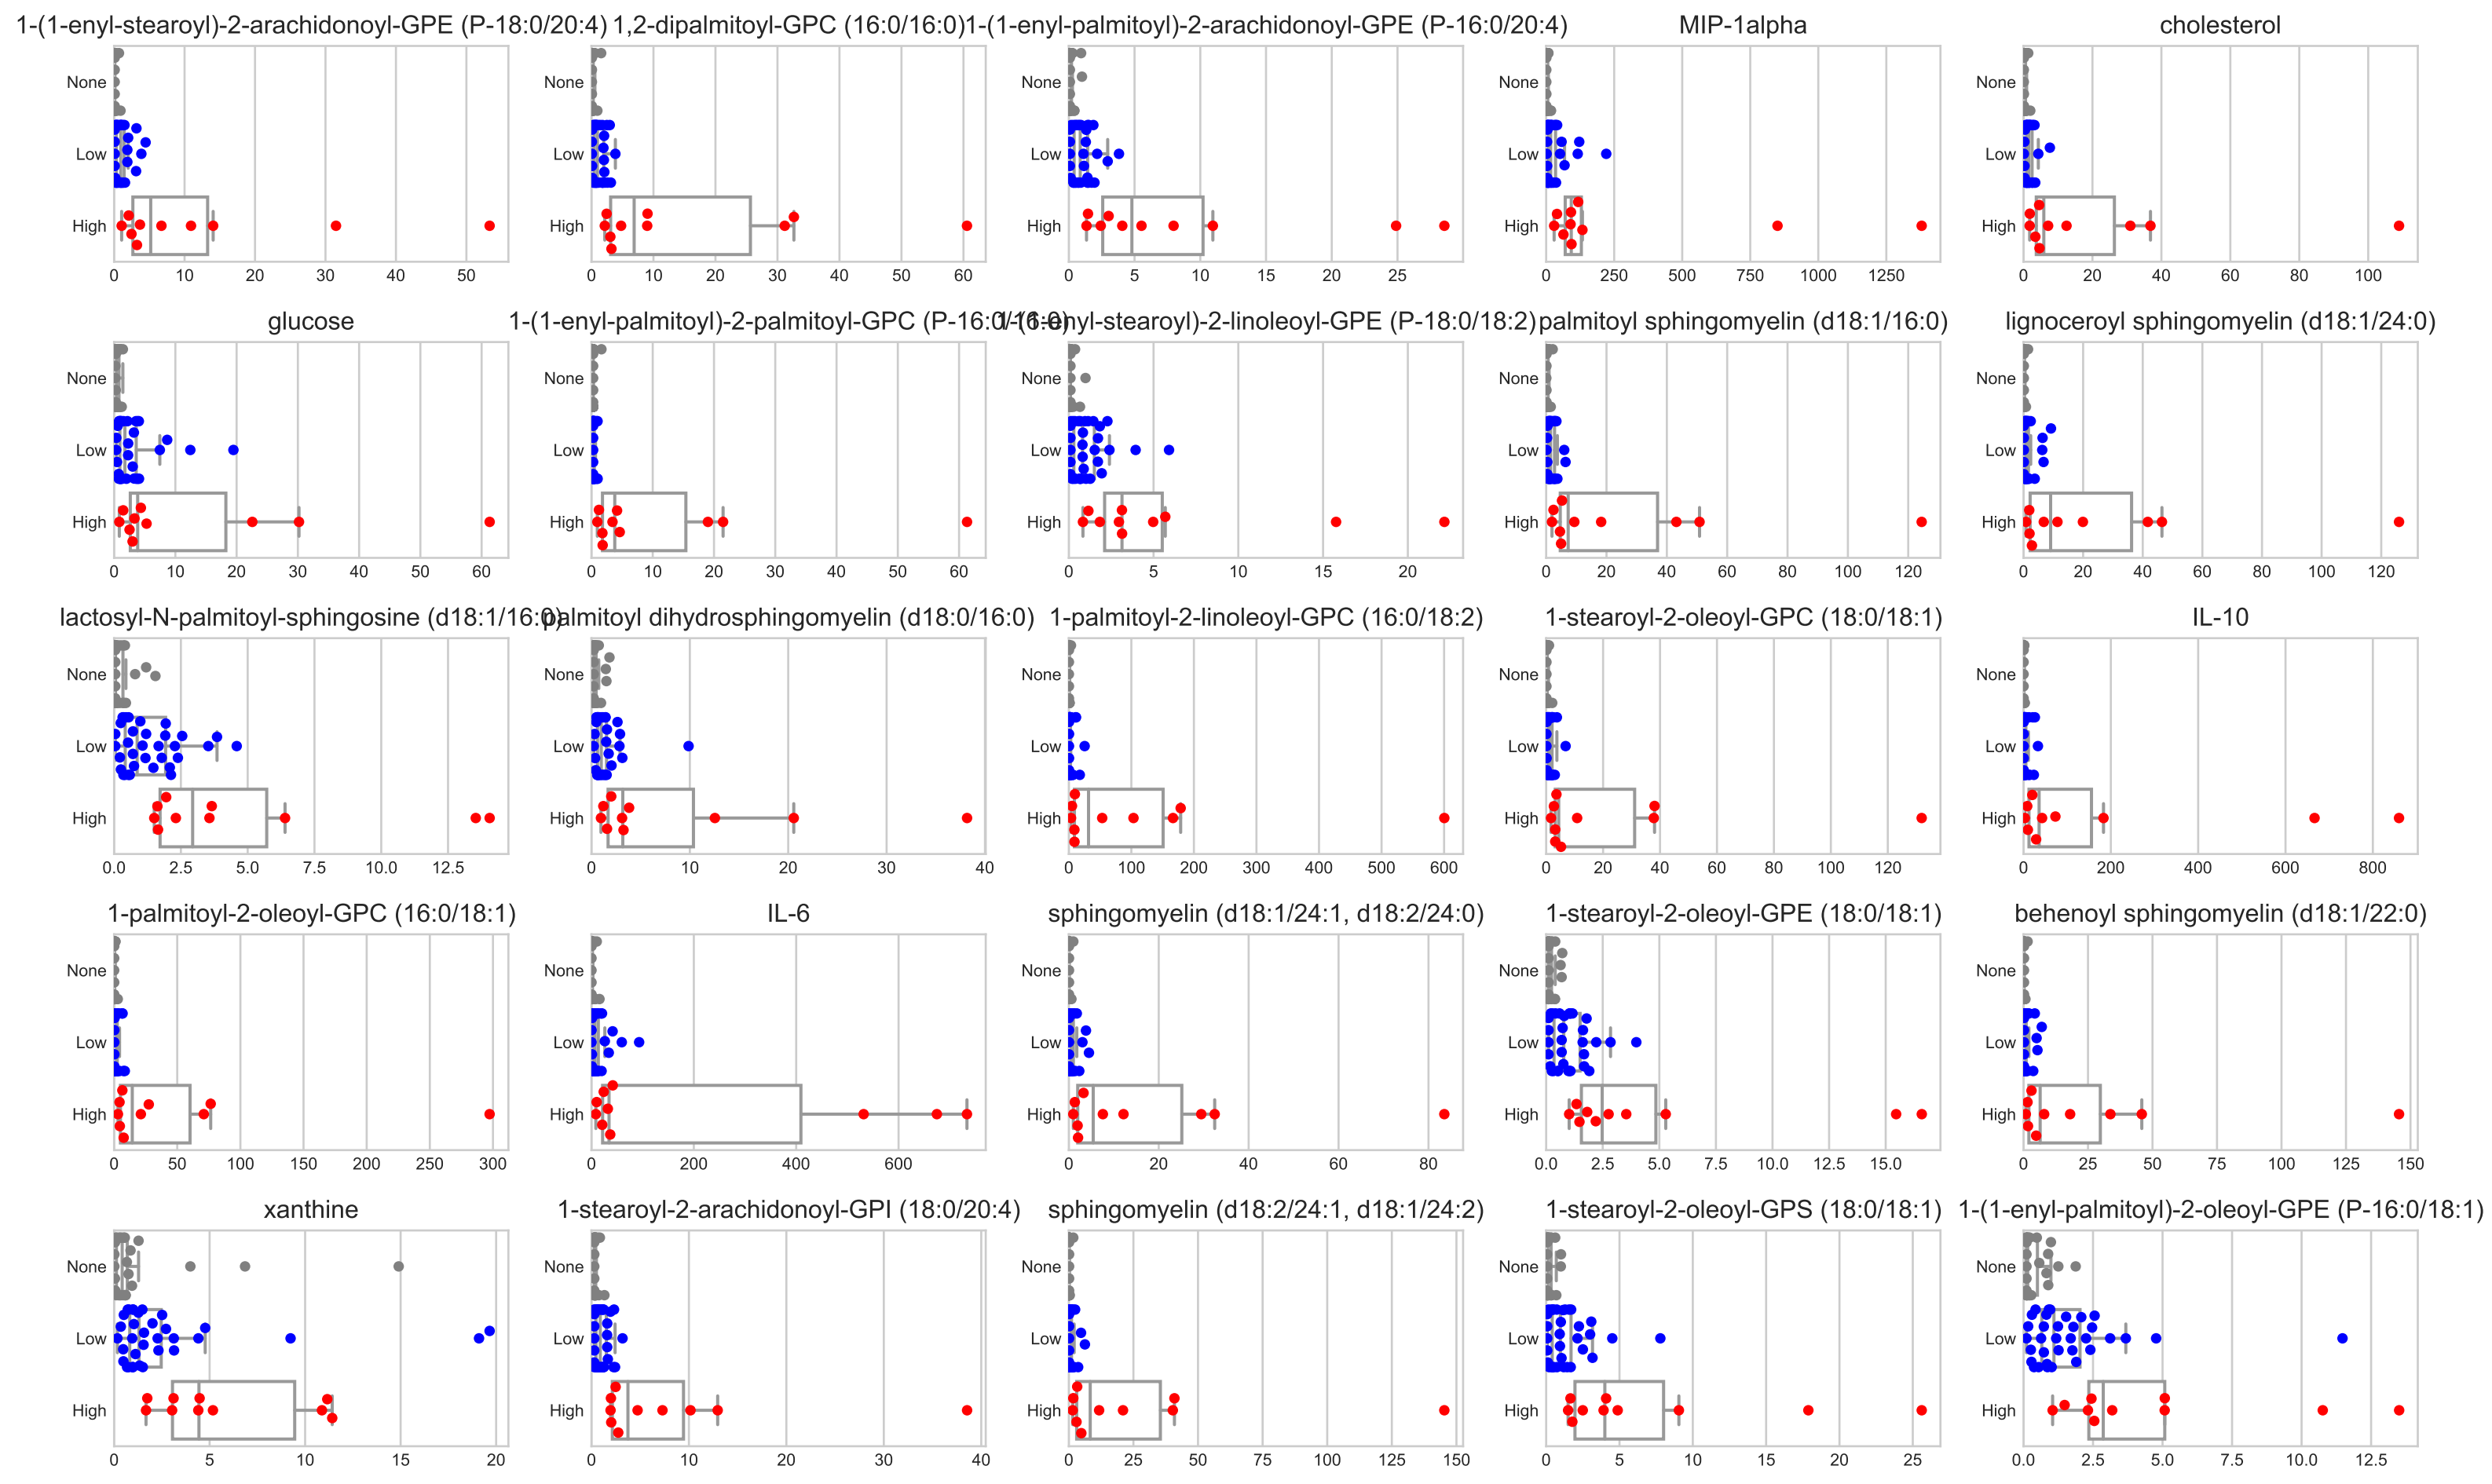

Supplement: pcbi.1009876.s015.pdf [file pcbi.1009876.s015.pdf]
