# Supplementary material for: Multi-omics data integration reveals metabolome as the top predictor of the cervicovaginal microenvironment
Source: PubMed Central journal article supplement (PMC8901057; doi:10.1371/journal.pcbi.1009876), 2022-02-23
Supplement: pcbi.1009876.s017.pdf [file pcbi.1009876.s017.pdf]

|                               | <i>Lactobacillus</i><br>dominance | Vaginal pH | Genital<br>inflammation | Disease<br>status |
|-------------------------------|-----------------------------------|------------|-------------------------|-------------------|
| <b>Patient<br/>covariates</b> |                                   |            |                         | ×                 |
| <b>Microbiome</b>             |                                   | ×          | ×                       | ×                 |
| <b>Immuno-<br/>proteome</b>   | ×                                 | ×          | ×                       | ×                 |
| <b>Metabolome</b>             | ×                                 | ×          | ×                       | ×                 |

1) Excluding seven cytokines and chemokines that were used to define target, namely IL-1 $\alpha$ , IL-1 $\beta$ , IL-8, MIP-1 $\beta$ , MIP-3 $\alpha$ , RANTES, and TNF $\alpha$ .
